# Supplementary material
Source: Elsevier journal article supplement (https://www.sciencedirect.com/science/article/pii/S0213911115001260)
Supplement: mmc1 [file S0213911115001260:mmc1.pdf]

EMPLOYMENT PRECARIOUSNESS SCALE - EPRES (2004-05)

TEMPORARINESS

- 1- The duration of your contract is  
2- During the last twelve months, how long did you work under temporary contracts?

DISEMPOWERMENT

- How did you settle the following employment conditions?  
3- Workplace schedule  
4- Weekly working hours  
5- Wages or salary

VULNERABILITY

- In relation to the way you are treated at work, can you tell me whether...  
6- You feel afraid to demand better working conditions  
7- You feel defenceless towards unfair treatment by your superiors  
8- You feel afraid of being fired for not doing what you are asked to do  
9- You are treated in a discriminatory and unjust manner  
10- You are treated in a authoritarian and violent manner  
11- You are made to feel you can be easily replaced

WAGES

- 12- Does your current salary allow you to cover your basic needs?  
13- Does your current salary allow you to cover unexpected expenses?  
14- How much is your take home (net) monthly wage or salary?

RIGHTS

- Of the following benefits, which do you have a right to...  
15- Paid vacations  
16- Pension  
17- Severance pay  
18- Maternity / paternity leave  
19- Day off for family or personal reasons  
20- Weekly holidays  
21- Unemployment benefit / compensation

EXERCISE RIGHTS

- Indicate how often you can exercise the following rights without obstacles...  
22- Weekly holidays  
23- Take sick leave  
24- Go to the doctor  
25- Take vacations  
26- Request a day off for family or personal reasons when needed

EMPLOYMENT PRECARIOUSNESS SCALE - EPRES (2010)

TEMPORARINESS

- 1- The duration of your contract is  
2- For how long (in all) have you been working for this company?

DISEMPOWERMENT

- How did you settle the following employment conditions?  
3- Workplace schedule  
4- Wages or salary

VULNERABILITY

- In relation to the way you are treated at work, can you tell me whether...  
5- You are able to demand better working conditions without being exposed to reprisals?  
6- You are defenceless towards unfair treatment by your superiors  
7- You would be fired for not doing all what you are asked to do  
  
8- You are treated in a authoritarian manner  
9- You are made to feel you can be easily replaced

WAGES

- 10- Does your current salary allow you to cover your basic needs?  
11- Does your current salary allow you to cover unexpected expenses?  
12- How much is your take home (net) monthly wage or salary?

RIGHTS

- Of the following benefits, which do you have a right to...  
  
13- Pension for old age or dissability  
14- Severance pay  
15- Maternity / paternity leave  
  
16- Unemployment benefit / compensation

EXERCISE RIGHTS

- Indicate how often you can exercise the following rights without obstacles...  
17- Weekly holidays  
18- Take sick leave  
19- Go to the doctor  
20- Take vacations  
21- Request a day off for personal reasons when needed  
22- Request a day off for family affairs when needed

This list of EPRES items for the 2004-05 and 2010 applications of the questionnaire serve illustrative purposes only. A validated english version of the questionnaire is not currently available.  
Further information on the EPRES can be requested from the authors.
